# Supplementary material for: Inhibition of the shuttle effect of lithium–sulfur batteriesviaa tannic acid-metal one-stepin situchemical film-forming modified separator
Source: Royal Society of Chemistry journal article supplement (doi:10.1039/d1nr00034a), 2021-01-01
Supplement: d1nr00034a1.pdf [file d1nr00034a1.pdf]

## Supporting Information

### **Inhibition of shuttle effect of lithium-sulfur battery by tannic acid-metal in-situ chemical film-forming modified separator**

Liwen Yang<sup>a</sup>, Yang Wang<sup>a</sup>, Qian Li<sup>a</sup>, Yuan Li<sup>a</sup>, Yanxiao Chen<sup>a, \*</sup>, Yuxia Liu<sup>b</sup>, Zhenguo Wu<sup>a</sup>, Gongke Wang<sup>c</sup>, Benhe Zhong<sup>a</sup>, Yang Song<sup>a</sup>, Wei Xiang<sup>d</sup>, Yanjun Zhong<sup>a</sup>, Xiaodong Guo<sup>a</sup>

<sup>a</sup> School of Chemical Engineering, Sichuan University, No. 24 South Section 1, Yihuan Road, Chengdu, 610065, PR China

<sup>b</sup> The Key Laboratory of Life-Organic Analysis, Key Laboratory of Pharmaceutical Intermediates and Analysis of Natural Medicine, School of Chemistry and Chemical Engineering, Qufu Normal University, Qufu, 273165, Shandong, PR China

<sup>c</sup> School of Materials Science and Engineering, Henan Normal University, XinXiang, 453007, PR China.

<sup>d</sup> College of Materials and Chemistry & Chemical Engineering, Chengdu University of Technology, Chengdu, 610059, PR China.

---

\* Corresponding author.

E-mail address: yxchen888@163.com (Y. Chen).

**Table S1.** Mass loading of TA-Co

|              | Pristine PP<br>separator(mg) | Coated<br>separator(mg) | Coating<br>mass(mg) | Mass<br>loading(mg/cm <sup>2</sup> ) |
|--------------|------------------------------|-------------------------|---------------------|--------------------------------------|
| <b>PP</b>    | 3.03                         | -                       | -                   | -                                    |
| <b>TA-Co</b> | 3.03                         | 3.204                   | 0.174               | <b>0.055</b>                         |

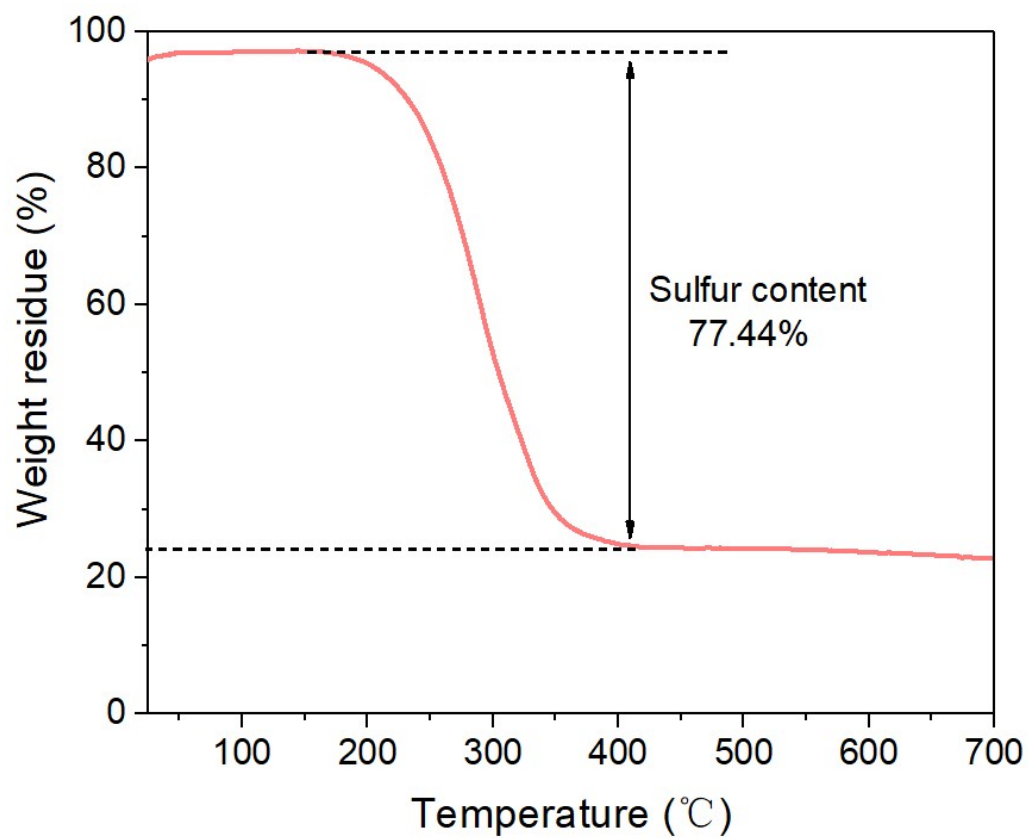

**Fig S1.** TGA curve of S/KB composite under N<sub>2</sub> atmosphere.

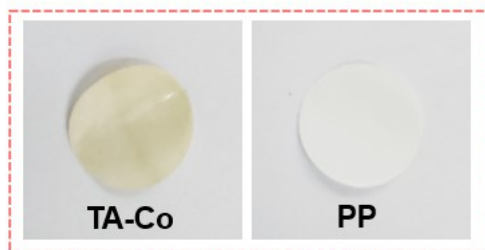

**Fig S2.** Optical photo of TA-Co and PP separator.

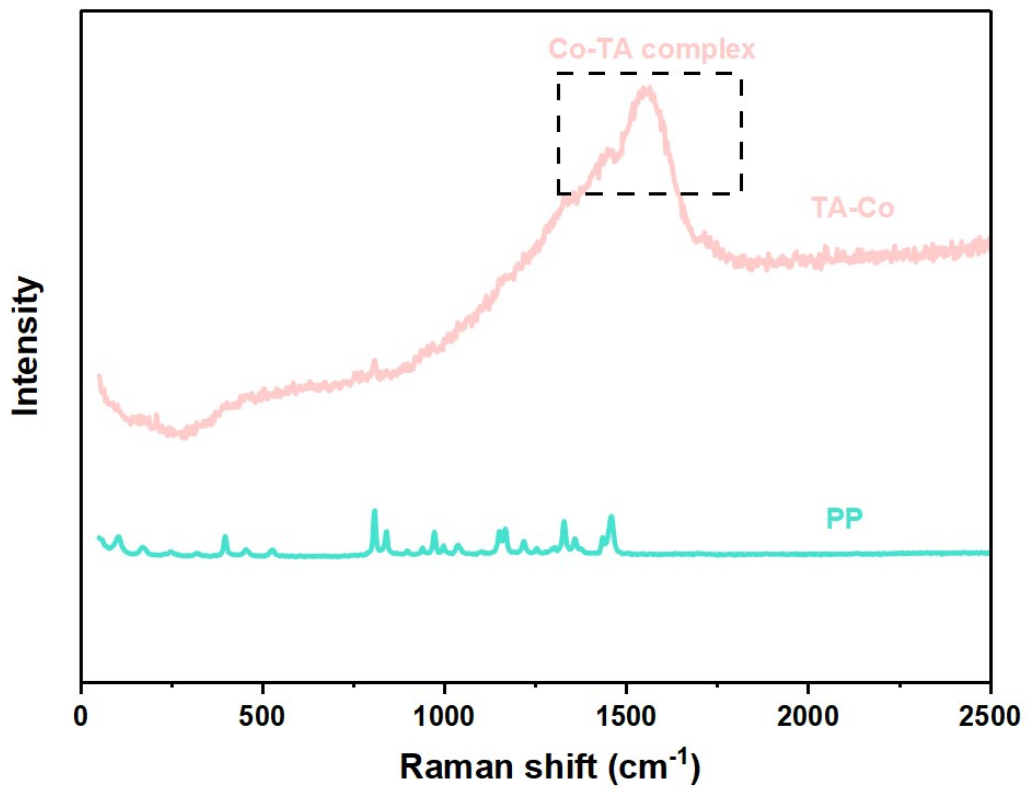

**Fig S3.** Raman spectra of TA-Co separator and PP separator.

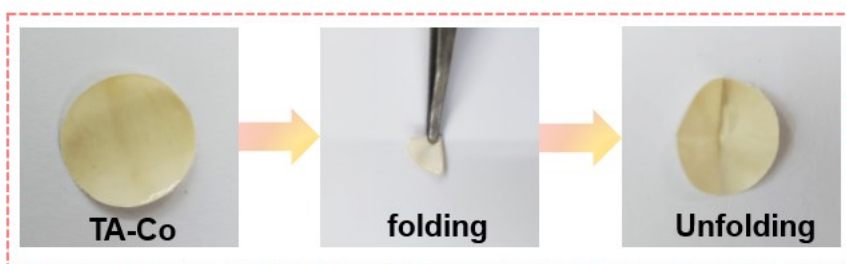

**Fig S4.** Folding-unfolding experiment of TA-Co separator.

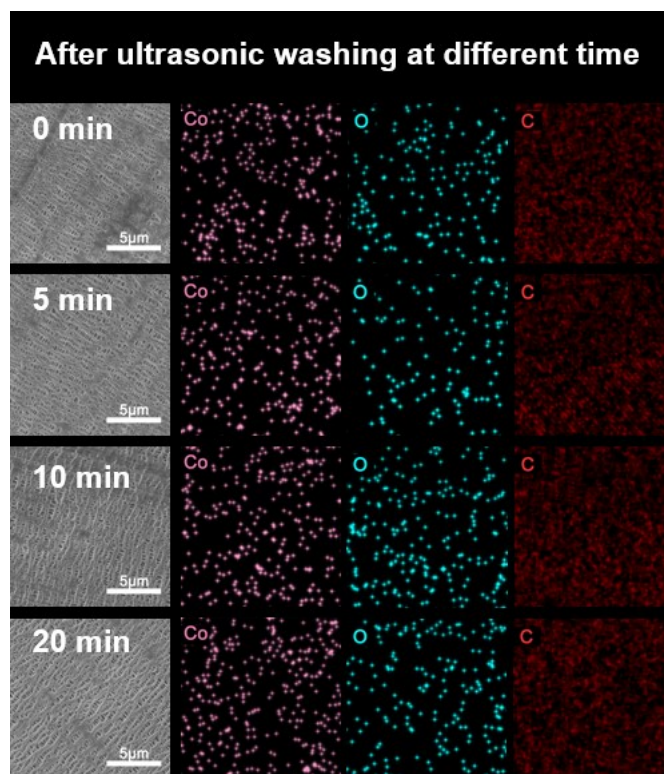

**Fig S5.** EDS-mapping of TA-Co separator after ultrasonic washing at different time.

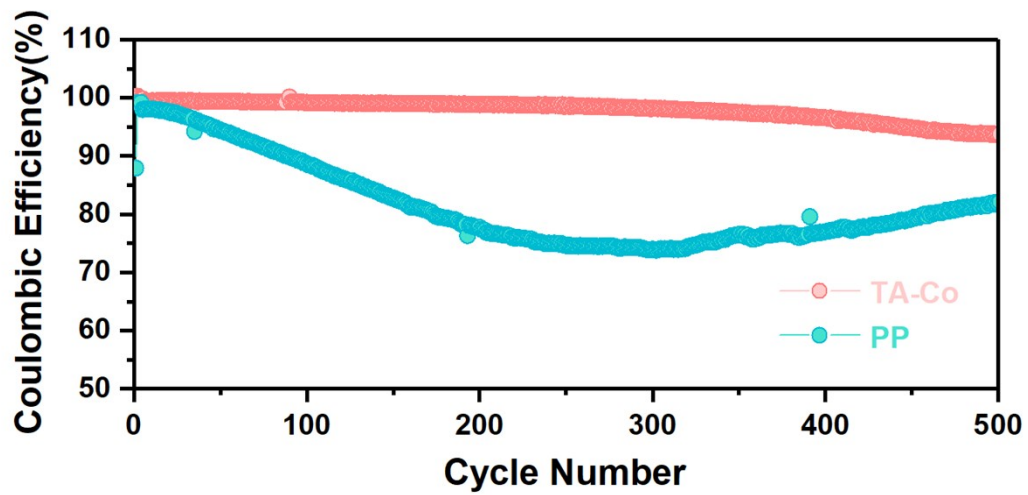

**Fig S6.** Coulombic efficiency of the cell of TA-Co and PP separator.



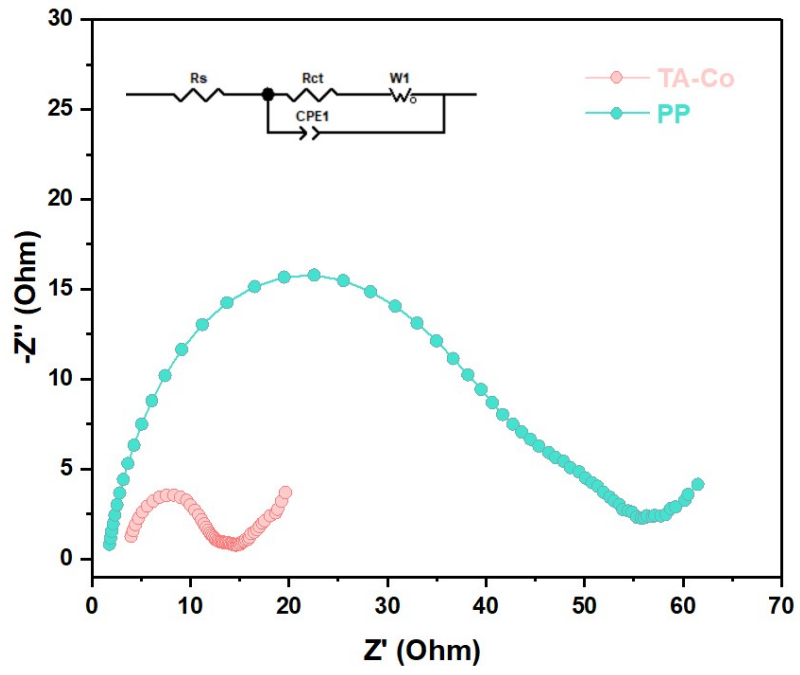

Fig S7. EIS of cells with TA-Co and PP separator before cycling.

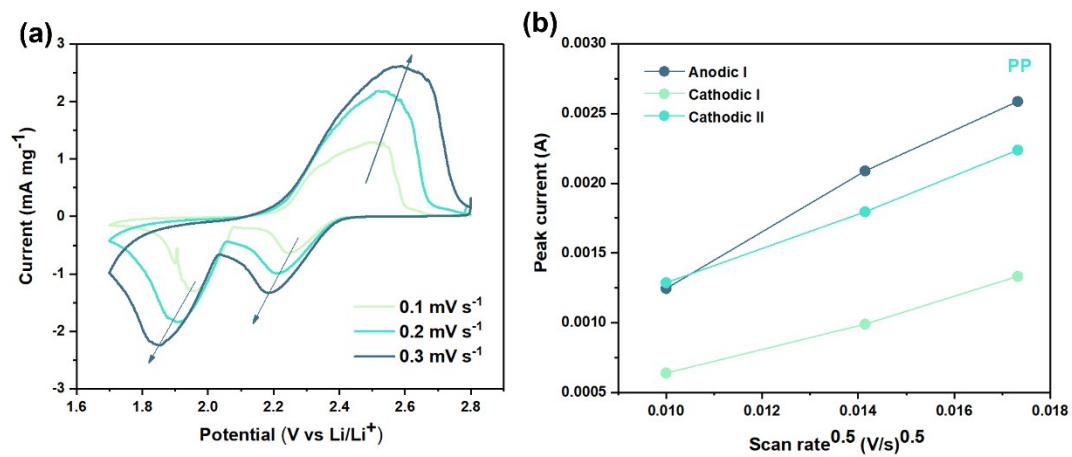

**Fig S8.** (a). CV curves of cells with PP separator from 0.1mV s<sup>-1</sup> to 0.3mV s<sup>-1</sup>. (b). The linear fits of the peak currents for cells with PP separator.

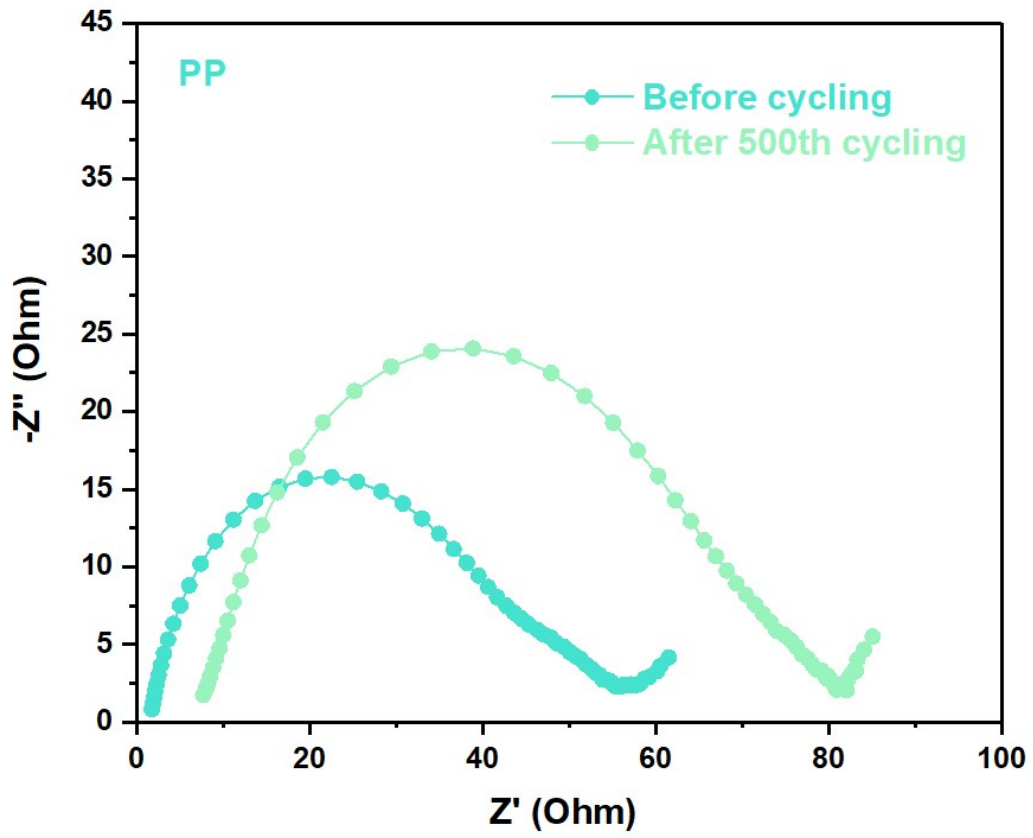

Fig S9. EIS of cells with PP separator before and after cycling.
